# Supplementary material for: Ecological Impact of End-of-Life-Tire (ELT)-Derived Rubbers: Acute and Chronic Effects at Organism and Population Levels
Source: MDPI journal article supplement (doi:10.3390/toxics10050201), 2022-04-19
Supplement: s1 [file s1]

## Composition of reconstituted water used in the ecotoxicological tests

### Acute and chronic tests on zebrafish (OECD 203, 210)

#### Acute test on *D. magna* (OECD 202)

Reconstituted water: analytical grade salts will be dissolved in purified water (conductivity < 10 µS/cm) to obtain the following nominal concentrations

|                                       |   |                                     |
|---------------------------------------|---|-------------------------------------|
| CaCl <sub>2</sub> * 2H <sub>2</sub> O | : | 2.0 mmol/L (= 294.0 mg/L)           |
| MgSO <sub>4</sub> * 7H <sub>2</sub> O | : | 0.5 mmol/L (= 123.3 mg/L)           |
| NaHCO <sub>3</sub>                    | : | 0.771 mmol/L (= 64.8 mg/L)          |
| KCl                                   | : | 0.078 mmol/L (= 5.8 mg/L)           |
| Water Hardness                        | : | 10 - 250 mg/L as CaCO <sub>3</sub>  |
| Alkalinity                            | : | 0.8 mmol/L                          |
| Ratio of                              |   | Ca : Mg = 4 : 1 (based on molarity) |
|                                       |   | Na : K = 10 : 1 (based on molarity) |

### Growth inhibition test on *P. subcapitata* (OECD 201)

Algal medium: in deionized water (conductivity < 5 µS/cm) analytical grade salts will be added to following final nominal concentrations:

|                  |                                                       |            |
|------------------|-------------------------------------------------------|------------|
| Macro-nutrients: | NaHCO <sub>3</sub>                                    | 50.0 mg/L  |
|                  | CaCl <sub>2</sub> * 2 H <sub>2</sub> O                | 18.0 mg/L  |
|                  | NH <sub>4</sub> Cl                                    | 15.0 mg/L  |
|                  | MgSO <sub>4</sub> * 7 H <sub>2</sub> O                | 15.0 mg/L  |
|                  | MgCl <sub>2</sub> * 6 H <sub>2</sub> O                | 12.0 mg/L  |
|                  | KH <sub>2</sub> PO <sub>4</sub>                       | 1.6 mg/L   |
| Trace Elements:  | Na <sub>2</sub> EDTA * 2 H <sub>2</sub> O             | 100.0 µg/L |
|                  | FeCl <sub>3</sub> * 6 H <sub>2</sub> O                | 64.0 µg/L  |
|                  | MnCl <sub>2</sub> * 4 H <sub>2</sub> O                | 415.0 µg/L |
|                  | H <sub>3</sub> BO <sub>3</sub>                        | 185.0 µg/L |
|                  | Na <sub>2</sub> MoO <sub>4</sub> * 2 H <sub>2</sub> O | 7.0 µg/L   |
|                  | ZnCl <sub>2</sub>                                     | 3.0 µg/L   |
|                  | CoCl <sub>2</sub> * 6 H <sub>2</sub> O                | 1.5 µg/L   |
|                  | CuCl <sub>2</sub> * 2 H <sub>2</sub> O                | 0.01 µg/L  |

pH 8.1 ± 0.2

## Chronic test on *D. magna* (OECD 211)

Reconstituted water: in deionized water (conductivity < 5 µS/cm), analytical grade, the following salts were added to a defined final nominal concentration:

|                  |                                                     |            |
|------------------|-----------------------------------------------------|------------|
| Trace Elements:  | H <sub>3</sub> BO <sub>3</sub>                      | 2860 mg/L  |
|                  | MnCl <sub>2</sub> *4H <sub>2</sub> O                | 0.361 mg/L |
|                  | LiCl                                                | 0.306 mg/L |
|                  | RbCl                                                | 0.071 mg/L |
|                  | SrCl <sub>2</sub> *6H <sub>2</sub> O                | 0.152 mg/L |
|                  | NaBr                                                | 0.016 mg/L |
|                  | MoNa <sub>2</sub> O <sub>4</sub> *2H <sub>2</sub> O | 0.063 mg/L |
|                  | CuCl <sub>2</sub> *2H <sub>2</sub> O                | 0.017 mg/L |
|                  | ZnCl <sub>2</sub>                                   | 0.013 mg/L |
|                  | CoCl <sub>2</sub> *6H <sub>2</sub> O                | 0.010 mg/L |
|                  | KI                                                  | 0.003 mg/L |
|                  | Na <sub>2</sub> SeO <sub>3</sub>                    | 0.002 mg/L |
|                  | NH <sub>4</sub> VO <sub>3</sub>                     | 0.001 mg/L |
|                  | Na <sub>2</sub> EDTA*2H <sub>2</sub> O              | 2.500 mg/L |
|                  | FeSO <sub>4</sub> *7H <sub>2</sub> O                | 0.996 mg/L |
| Macro-nutrients: | CaCl <sub>2</sub> *2H <sub>2</sub> O                | 293.8 mg/L |
|                  | MgSO <sub>4</sub> *7H <sub>2</sub> O                | 123.3 mg/L |
|                  | KCl                                                 | 5.8 mg/L   |
|                  | NaHCO <sub>3</sub>                                  | 64.8 mg/L  |
|                  | Na <sub>2</sub> SiO <sub>3</sub> *9H <sub>2</sub> O | 10 mg/L    |
|                  | NaNO <sub>3</sub>                                   | 0.274 mg/L |
|                  | KH <sub>2</sub> PO <sub>4</sub>                     | 0.143 mg/L |
|                  | K <sub>2</sub> HPO <sub>4</sub>                     | 0.184 mg/L |
|                  | Thiamine hydrochloride                              | 75 µg/L    |
|                  | Cyanocobalamine (B12)                               | 1 µg/L     |
|                  | Biotine                                             | 0.75 µg/L  |
