# Supplementary material for: Ecological Impact of End-of-Life-Tire (ELT)-Derived Rubbers: Acute and Chronic Effects at Organism and Population Levels
Source: MDPI journal article supplement (doi:10.3390/toxics10050201), 2022-04-19
Supplement: s1 [file s1]

**Table S1.** Chemicals (mg/Kg) quantified in the 20 different ELT-dg samples (solid fraction). Zinc oxide, Titanium oxide and Magnesium oxide were not detected analytically in the samples and for this reason their presence in the ELT-dg was not certified.
