# Supplementary material for: Ecological Impact of End-of-Life-Tire (ELT)-Derived Rubbers: Acute and Chronic Effects at Organism and Population Levels
Source: MDPI journal article supplement (doi:10.3390/toxics10050201), 2022-04-19
Supplement: s1 [file s1]

| Substance            | CAS       | Method                          | Environmental hazard classification CLP (Annex VI): hazardous to the aquatic environment | (A) mg component/kg (max) = µg/g | (B) µg component in 100 mg sample | (C) µg component/L in 100 mg sample/L suspension | (D) µg component/L in 100 mg sample/L suspension |
|----------------------|-----------|---------------------------------|------------------------------------------------------------------------------------------|----------------------------------|-----------------------------------|--------------------------------------------------|--------------------------------------------------|
| Benzo(a)pyrene       | 50-32-8   | EPA 3510C 1996 + EPA 8270E 2018 | H400 Aquatic acute 1<br>H410 Aquatic chronic 1                                           | 1.6                              | 0.2                               | 0.2                                              | < 0.0011                                         |
| Benzo(a)anthracene   | 56-55-3   | EPA 3510C 1996 + EPA 8270E 2018 | H400 Aquatic acute 1<br>M=100<br>H410 Aquatic chronic 1<br>M=100                         | 1.6                              | 0.2                               | 0.2                                              | < 0.0011                                         |
| Benzo(b)fluoranthene | 205-99-2  | EPA 3510C 1996 + EPA 8270E 2018 | H400 Aquatic acute 1<br>H410 Aquatic chronic 1                                           | 0.9                              | 0.1                               | 0.1                                              | < 0.0012                                         |
| Benzo(e)pyrene       | 192-97-2  | EPA 3510C 1996 + EPA 8270E 2018 | H400 Aquatic acute 1<br>H410 Aquatic chronic 1                                           | 1.7                              | 0.2                               | 0.2                                              | < 0.0010                                         |
| Chrysene             | 218-01-9  | EPA 3510C 1996 + EPA 8270E 2018 | H400 Aquatic acute 1<br>H410 Aquatic chronic 1                                           | 1.8                              | 0.2                               | 0.2                                              | < 0.0011                                         |
| Naphthalene          | 91-20-3   | EPA 3510C 1996 + EPA 8270E 2018 | H400 Aquatic acute 1<br>H410 Aquatic chronic 1                                           | 1.1                              | 0.1                               | 0.1                                              | 0.0101                                           |
| Lead                 | 7439-92-1 | EPA 6020B 2014                  | H400 Aquatic acute 1<br>H410 Aquatic chronic 1                                           | 14.6                             | 1.5                               | 1.5                                              | < 0.61                                           |
| Cobalt               | 7440-48-4 | EPA 6020B 2014                  | H413 Aquatic chronic 4                                                                   | 153.0                            | 15.3                              | 15.3                                             | < 0.31                                           |
| Cobalt sulfide       | 1317-42-6 | P-AM-817 Rev.0                  | H400 Aquatic acute 1<br>M=100<br>H410 Aquatic chronic 1<br>M=100                         | -                                | -                                 | -                                                | < 0.50                                           |

|                                |           |                                       |                                                                    |         |        |        |        |
|--------------------------------|-----------|---------------------------------------|--------------------------------------------------------------------|---------|--------|--------|--------|
| Zinc                           | 7440-66-6 | EPA 6020B 2014                        | H400 Aquatic acute 1<br>H410 Aquatic chronic 1                     | 10919.0 | 1091.9 | 1091.9 | 53.4   |
| Arsenic                        | 7440-38-2 | EPA 6020B 2014                        | H410 Aquatic chronic 1                                             | 5.8     | 0.6    | 0.6    | < 0.30 |
| Copper                         | 7440-50-8 | EPA 6020B 2014                        | H411 Aquatic chronic 2<br>proposed classification                  | 38.4    | 3.8    | 3.8    | 2.23   |
| 2-mercaptobenzothiazole        | 149-30-4  | EPA 3510C 1996<br>+ EPA 8270E<br>2018 | H400 Aquatic acute 1<br><br>H410 Aquatic chronic 1                 | 302.0   | 30.2   | 30.2   | < 1    |
| 4-t-octylphenol                | 140--66-9 | EPA 3510C 1996<br>+ EPA 8270E<br>2018 | H400 Aquatic acute 1<br>M=10<br><br>H410 Aquatic chronic 1<br>M=10 | 43.7    | 4.4    | 4.4    | < 1    |
| 4-tert butylphenol             | 98-54-4   | EPA 3510C 1996<br>+ EPA 8270E<br>2018 | H410 Aquatic chronic 1<br>M=1                                      | 7.7     | 0.8    | 0.8    | < 1    |
| Diisobutyl phthalate           | 84-69-5   | EPA 3510C 1996<br>+ EPA 8270E<br>2018 | H400 Aquatic acute 1                                               | 7.2     | 0.7    | 0.7    | 0.764  |
| Dibutyl phthalate              | 84-74-2   | EPA 3510C 1996<br>+ EPA 8270E<br>2018 | H400 Aquatic acute 1                                               | 2.3     | 0.2    | 0.2    | 0.186  |
| Aniline                        | 62-53-3   | EPA 3510C 1996<br>+ EPA 8270E<br>2018 | H400 Aquatic acute 1                                               | 78.4    | 7.8    | 7.8    | 0.851  |
| Cyclohexanamine, N-cyclohexyl- | 101-83-7  | EPA 3510C 1996<br>+ EPA 8270E<br>2018 | H400 Aquatic acute 1<br>H410 Aquatic chronic 1                     | 175.6   | 17.6   | 17.6   | < 1    |
| N,N'-diphenylguanidine (DPG)   | 102-06-7  | EPA 3510C 1996<br>+ EPA 8270E<br>2018 | H411 Aquatic chronic 2                                             | 5.8     | 0.6    | 0.6    | < 1    |

**Table S2.** Twenty selected chemicals with the concentration detected in the ELT suspensions. In the table are reported the CAS number, the used methods for the chemical detection, the CLP classification as well as the theoretical and analytical concentration of considered substances/elements. In particular, in the column (A) it is reported the max concentration measured in the 100.0 mg/L of ELT-dg suspensions (mg of each component in 1 Kg of ELT-dg, corresponding to µg in 1 g of ELT-dg; Table S1), in the column (B) the µg component in 100 mg of sample (calculated from max concentration), in the column (C) the theoretical concentration calculated assuming the hypothesis that all the amount present in 100 mg of ELT-dg was dissolved/solubilized in 1 L of water and, lastly, in the column (D) the analytical concentration measured in the 100.0 mg/L of ELT-dp.
